# Supplementary material
Source: publisher figshare collection journal article supplement (https://karger.figshare.com/ndownloader/files/35989775)
Supplement: Supplementary file 1 [file 35989775]

**Supplementary Table 2 –** Incidence of PTB at different gestational age and cultural specimen results.

|  | Positive Swab | Negative Swab | p-value | Positive UCU | Negative UCU | p-value |
| --- | --- | --- | --- | --- | --- | --- |
| Very Early PTB  (<28 weeks) | ***5/7 (71.4%)*** | ***2/7 (28.6%)*** | ***0.046*** | 3/6  (50%) | 3/6  (50%) | *0.18* |
| Early PTB  (28-34 weeks) | 10/27 (37%) | 17/27 (63%) | *0.73* | 6/25 (24%) | 19/25 (76%) | *0.82* |
| Late PTB  (34-37 weeks) | 13/36 (36.1%) | 23/36 (63.9%) | *0.78* | 5/35 (14.3%) | 30/35 (85.7%) | *0.08* |

PTB: Preterm Birth; UCU: Urine culture
